# Supplementary material
Source: publisher site journal article supplement (https://www.dovepress.com/article/363959)

Supplementary Material 1: Profile of the included articles

| <b>S/N</b> | <b>Author(s)/year</b> | <b>Design</b>                     | <b>Setting</b>               | <b>Theme – cause/risk factor</b>                                                                                                                                                      |
|------------|-----------------------|-----------------------------------|------------------------------|---------------------------------------------------------------------------------------------------------------------------------------------------------------------------------------|
| 1.         | Punab et al 2017      | Prospective study                 | Estonia                      | Biological/Physiological                                                                                                                                                              |
| 2.         | Ahmed et al 2010      | Retrospective study of case notes | Nigeria                      | Biological/Physiological                                                                                                                                                              |
| 3.         | Okonofua et al 2005   | Case-control study                | Nigeria                      | Biological/physiological; Behavioral/lifestyle risk factors (Smoking, alcohol intake, STD, medication); Socio-demographic risk factors                                                |
| 4.         | Osazuwa et al 2013    | Case-control study                | Nigeria                      | Biological/Physiological; Socio-demographic risk factors                                                                                                                              |
| 5.         | Smolak et al 2019     | Systematic Review                 | Middle East and North Africa | Biological/Physiological                                                                                                                                                              |
| 6.         | Abarikwu, 2013        | Review                            | Nigeria                      | Biological/Physiological; Environmental Risk Factors                                                                                                                                  |
| 7.         | Olayemi, 2010         | Review                            | Unspecified                  | Biological/physiological; Other behavioural/lifestyle factors such as excessive intake of antioxidants, illicit drugs etc. Environmental Risk Factors                                 |
| 8.         | Olooto, 2012          | Review                            | Unspecified                  | Biological/physiological; Other behavioural/lifestyle factors such as excessive intake of antioxidants, illicit drugs etc. Environmental Risk Factors                                 |
| 9.         | Sengupta et al 2017   | Systematic Review                 | African Population           | Biological/physiological; Other behavioural/lifestyle factors such as excessive intake of antioxidants, illicit drugs etc.; Environmental Risk Factors Socio-demographic risk factors |
| 10         | Uadia & Emokpae, 2015 | Review                            | Nigeria                      | Biological/physiological; Other behavioural/lifestyle factors such as excessive intake of antioxidants, illicit drugs etc.; Environmental Risk Factors                                |
| 11         | Jeje et al 2016       | Retrospective study of case notes | Nigeria                      | Biological/Physiological                                                                                                                                                              |

|    |                         |                                   |              |                                                                                                                                                                                                                                |
|----|-------------------------|-----------------------------------|--------------|--------------------------------------------------------------------------------------------------------------------------------------------------------------------------------------------------------------------------------|
| 12 | Garba-Alkali et al 2018 | Cross-sectional study             | Nigeria      | Biological/physiological;<br>Behavioral/lifestyle risk factors (Smoking, alcohol intake, STD, medication, Body mass index)<br>Other behavioural/lifestyle factors such as excessive intake of antioxidants, illicit drugs etc. |
| 13 | Idrisa et al 2001       | Retrospective study of case notes | Nigeria      | Biological/Physiological                                                                                                                                                                                                       |
| 14 | Enwurua et al 2016      | Case-control study                | Nigeria      | Biological/Physiological                                                                                                                                                                                                       |
| 15 | Emokpae et al 2009      | Observational Study               | Nigeria      | Biological/Physiological                                                                                                                                                                                                       |
| 16 | Ugwuja et al 2008       | Cross-sectional study             | Nigeria      | Biological/Physiological;<br>Socio-demographic risk factors                                                                                                                                                                    |
| 17 | Folkvord et al 2005     | Cross-sectional study             | Zimbabwe     | Biological/physiological;<br>Behavioral/lifestyle risk factors (Smoking, alcohol intake, STD, medication)                                                                                                                      |
| 18 | Ibadin et al 2009       | Case-control study                | Nigeria      | Biological/Physiological                                                                                                                                                                                                       |
| 19 | Osegbe & Amaku 1985     | Prospective study                 | Nigeria      | Biological/Physiological                                                                                                                                                                                                       |
| 20 | Bayasgalan et al 2004   | Prospective Case-control study    | Mongolia     | Biological/physiological;<br>Behavioral/lifestyle risk factors (Smoking, alcohol intake, STD, medication)                                                                                                                      |
| 21 | Wright et al, 2014      | Review                            | Unspecified  | Biological/Physiological                                                                                                                                                                                                       |
| 22 | Mahboubi et al 2014     | Case-Control study                | Turkey       | Biological/physiological;<br>Behavioral/lifestyle risk factors (Smoking, alcohol intake, STD, medication); Socio-demographic risk factors                                                                                      |
| 23 | Khalil et al 2012       | Case-control study                | Egypt        | Biological/Physiological                                                                                                                                                                                                       |
| 24 | Leisegang et al 2014    | Case-control study                | South Africa | Biological/Physiological                                                                                                                                                                                                       |
| 25 | Ferlin et al., 2007     | Review                            | Unspecified  | Causes associated with gene/genotype                                                                                                                                                                                           |
| 26 | Ferlin & Foresta, 2014  | Review                            | Unspecified  | Causes associated with gene/genotype                                                                                                                                                                                           |
| 27 | Krausz & Giachini, 2007 | Review                            | Unspecified  | Causes associated with gene/genotype                                                                                                                                                                                           |

|    |                         |                                        |              |                                                                                                                                                                                 |
|----|-------------------------|----------------------------------------|--------------|---------------------------------------------------------------------------------------------------------------------------------------------------------------------------------|
| 28 | Mosaad et al 2012       | Case-control study                     | Egypt        | Causes associated with gene/genotype                                                                                                                                            |
| 29 | Roshdy et al 2015       | Case-control study                     | Egypt        | Causes associated with gene/genotype                                                                                                                                            |
| 30 | Omran et al 2018        | Case-control study                     | Egypt        | Causes associated with gene/genotype                                                                                                                                            |
| 31 | Eloualid et al 2014     | Case-control study                     | Morocco      | Causes associated with gene/genotype                                                                                                                                            |
| 32 | Ghorbel et al 2014      | Case-control study                     | Tunisia      | Causes associated with gene/genotype                                                                                                                                            |
| 33 | Ikechebelu et al., 2003 | Cross-sectional study                  | Nigeria      | Behavioral/lifestyle risk factors (Smoking, alcohol intake, STD, medication)                                                                                                    |
| 34 | Emeghe & Ekeke 2017     | Cross-sectional study                  | Nigeria      | Behavioral/lifestyle risk factors (Smoking, alcohol intake, STD, medication);<br>Socio-demographic risk factors                                                                 |
| 35 | Ness et al 1997         | Literature review                      | Unspecified  | Behavioral/lifestyle risk factors (Smoking, alcohol intake, STD, medication)                                                                                                    |
| 36 | Durairajanayagam, 2018  | Systematic review                      | Unspecified  | Behavioral/lifestyle risk factors (Smoking, alcohol intake, STD, medication)<br>Other behavioural/lifestyle factors such as excessive intake of antioxidants, illicit drugs etc |
| 37 | Benbella et al 2018     | Retrospective study of medical records | Morocco      | Behavioral/lifestyle risk factors (Smoking, alcohol intake, STD, medication)                                                                                                    |
| 38 | Meri et al 2013         | Case-control study                     | Oman         | Behavioral/lifestyle risk factors (Smoking, alcohol intake, STD, medication)                                                                                                    |
| 39 | Mostafa, 20210          | Systematic review                      | Unspecified  | Behavioral/lifestyle risk factors (Smoking, alcohol intake, STD, medication)                                                                                                    |
| 40 | Bornman et al 1994      | Observational study                    | South Africa | Behavioral/lifestyle risk factors (Smoking, alcohol intake, STD, medication)                                                                                                    |
| 41 | Abayomi et al., 2018    | Cross-sectional study                  | Nigeria      | Behavioral/lifestyle risk factors (Body mass index);<br>Socio-demographic risk factors                                                                                          |
| 42 | Hajshafiha et al., 2013 | Observational study                    | Iran         | Behavioral/lifestyle risk factors (Body mass index)                                                                                                                             |

|    |                         |                            |                   |                                                                                                  |
|----|-------------------------|----------------------------|-------------------|--------------------------------------------------------------------------------------------------|
| 43 | Keszthelyi et al., 2020 | Cross-sectional study      | Budapest, Hungary | Behavioral/lifestyle risk factors (Body mass index)                                              |
| 44 | Nguyen et al., 2007     | Retrospective cohort study | Norway            | Behavioral/lifestyle risk factors (Body mass index)                                              |
| 45 | Oghagbon et al., 2004   | Cross-sectional study      | Nigeria           | Behavioral/lifestyle risk factors (Body mass index);<br>Socio-demographic risk factors           |
| 46 | Egwurugwu et al. 2011   | Cross-sectional study      | Nigeria           | Behavioral/lifestyle risk factors (Body mass index)                                              |
| 47 | Amah et al. (012        | Case-control study         | Nigeria           | Behavioral/lifestyle risk factors (Body mass index)                                              |
| 48 | Alshahrani et al. 2016  | Prospective study          | Saudi Arabia      | Behavioral/lifestyle risk factors (Body mass index)                                              |
| 49 | Katib, 2015             | Review                     | Unspecified       | Behavioral/lifestyle risk factors (Body mass index)                                              |
| 50 | Henkel et al., 2019     | Review                     | Unspecified       | Other behavioural/lifestyle factors such as excessive intake of antioxidants, illicit drugs etc. |
| 51 | Henkel et al, 2020      | Review                     | Unspecified       | Other behavioural/lifestyle factors such as excessive intake of antioxidants, illicit drugs etc. |
| 52 | Leisegang et al., 2020  | Review                     | Unspecified       | Other behavioural/lifestyle factors such as excessive intake of antioxidants, illicit drugs etc. |
| 53 | Inhorn et al., 2008     | Case-control study         | Lebanon           | Environmental Risk Factors                                                                       |
| 54 | Al-Otaibi, 2018         | Cross-sectional study      | Saudi Arabia      | Environmental Risk Factors                                                                       |
| 55 | Saalu & Osinubi, 2009   | Review                     | Unspecified       | Environmental Risk Factors                                                                       |
| 56 | Oliva et al. 2001       | Observational study        | Argentina         | Environmental Risk Factors                                                                       |
| 57 | Aneck-Hahn et al. 2007  | Cross-sectional study      | South Africa      | Environmental Risk Factors                                                                       |
| 58 | Akinloye et al., 2006   | Case-control study         | Nigeria           | Environmental Risk Factors                                                                       |
| 59 | Ibeh et al 1994         | Case-control study         | Nigeria           | Environmental Risk Factors                                                                       |
| 60 | Dunson et al., 2004     | Prospective cohort study   | Europe            | Socio-demographic risk factors                                                                   |

## Preferred Reporting Items for Systematic reviews and Meta-Analyses extension for Scoping Reviews (PRISMA-ScR) Checklist

| SECTION                                               | ITEM | PRISMA-ScR CHECKLIST ITEM                                                                                                                                                                                                                                                                                  | REPORTED ON PAGE # |
|-------------------------------------------------------|------|------------------------------------------------------------------------------------------------------------------------------------------------------------------------------------------------------------------------------------------------------------------------------------------------------------|--------------------|
| <b>TITLE</b>                                          |      |                                                                                                                                                                                                                                                                                                            |                    |
| Title                                                 | 1    | Identify the report as a scoping review.                                                                                                                                                                                                                                                                   |                    |
| <b>ABSTRACT</b>                                       |      |                                                                                                                                                                                                                                                                                                            |                    |
| Structured summary                                    | 2    | Provide a structured summary that includes (as applicable): background, objectives, eligibility criteria, sources of evidence, charting methods, results, and conclusions that relate to the review questions and objectives.                                                                              |                    |
| <b>INTRODUCTION</b>                                   |      |                                                                                                                                                                                                                                                                                                            |                    |
| Rationale                                             | 3    | Describe the rationale for the review in the context of what is already known. Explain why the review questions/objectives lend themselves to a scoping review approach.                                                                                                                                   |                    |
| Objectives                                            | 4    | Provide an explicit statement of the questions and objectives being addressed with reference to their key elements (e.g., population or participants, concepts, and context) or other relevant key elements used to conceptualize the review questions and/or objectives.                                  |                    |
| <b>METHODS</b>                                        |      |                                                                                                                                                                                                                                                                                                            |                    |
| Protocol and registration                             | 5    | Indicate whether a review protocol exists; state if and where it can be accessed (e.g., a Web address); and if available, provide registration information, including the registration number.                                                                                                             |                    |
| Eligibility criteria                                  | 6    | Specify characteristics of the sources of evidence used as eligibility criteria (e.g., years considered, language, and publication status), and provide a rationale.                                                                                                                                       |                    |
| Information sources*                                  | 7    | Describe all information sources in the search (e.g., databases with dates of coverage and contact with authors to identify additional sources), as well as the date the most recent search was executed.                                                                                                  |                    |
| Search                                                | 8    | Present the full electronic search strategy for at least 1 database, including any limits used, such that it could be repeated.                                                                                                                                                                            |                    |
| Selection of sources of evidence†                     | 9    | State the process for selecting sources of evidence (i.e., screening and eligibility) included in the scoping review.                                                                                                                                                                                      |                    |
| Data charting process‡                                | 10   | Describe the methods of charting data from the included sources of evidence (e.g., calibrated forms or forms that have been tested by the team before their use, and whether data charting was done independently or in duplicate) and any processes for obtaining and confirming data from investigators. |                    |
| Data items                                            | 11   | List and define all variables for which data were sought and any assumptions and simplifications made.                                                                                                                                                                                                     |                    |
| Critical appraisal of individual sources of evidence§ | 12   | If done, provide a rationale for conducting a critical appraisal of included sources of evidence; describe the methods used and how this information was used in any data synthesis (if appropriate).                                                                                                      |                    |
| Synthesis of results                                  | 13   | Describe the methods of handling and summarizing the data that were charted.                                                                                                                                                                                                                               |                    |

| SECTION                                       | ITEM | PRISMA-ScR CHECKLIST ITEM                                                                                                                                                                       | REPORTED ON PAGE # |
|-----------------------------------------------|------|-------------------------------------------------------------------------------------------------------------------------------------------------------------------------------------------------|--------------------|
| <b>RESULTS</b>                                |      |                                                                                                                                                                                                 |                    |
| Selection of sources of evidence              | 14   | Give numbers of sources of evidence screened, assessed for eligibility, and included in the review, with reasons for exclusions at each stage, ideally using a flow diagram.                    |                    |
| Characteristics of sources of evidence        | 15   | For each source of evidence, present characteristics for which data were charted and provide the citations.                                                                                     |                    |
| Critical appraisal within sources of evidence | 16   | If done, present data on critical appraisal of included sources of evidence (see item 12).                                                                                                      |                    |
| Results of individual sources of evidence     | 17   | For each included source of evidence, present the relevant data that were charted that relate to the review questions and objectives.                                                           |                    |
| Synthesis of results                          | 18   | Summarize and/or present the charting results as they relate to the review questions and objectives.                                                                                            |                    |
| <b>DISCUSSION</b>                             |      |                                                                                                                                                                                                 |                    |
| Summary of evidence                           | 19   | Summarize the main results (including an overview of concepts, themes, and types of evidence available), link to the review questions and objectives, and consider the relevance to key groups. |                    |
| Limitations                                   | 20   | Discuss the limitations of the scoping review process.                                                                                                                                          |                    |
| Conclusions                                   | 21   | Provide a general interpretation of the results with respect to the review questions and objectives, as well as potential implications and/or next steps.                                       |                    |
| <b>FUNDING</b>                                |      |                                                                                                                                                                                                 |                    |
| Funding                                       | 22   | Describe sources of funding for the included sources of evidence, as well as sources of funding for the scoping review. Describe the role of the funders of the scoping review.                 |                    |

JB1 = Joanna Briggs Institute; PRISMA-ScR = Preferred Reporting Items for Systematic reviews and Meta-Analyses extension for Scoping Reviews.

\* Where *sources of evidence* (see second footnote) are compiled from, such as bibliographic databases, social media platforms, and Web sites.

† A more inclusive/heterogeneous term used to account for the different types of evidence or data sources (e.g., quantitative and/or qualitative research, expert opinion, and policy documents) that may be eligible in a scoping review as opposed to only studies. This is not to be confused with *information sources* (see first footnote).

‡ The frameworks by Arksey and O'Malley (6) and Levac and colleagues (7) and the JB1 guidance (4, 5) refer to the process of data extraction in a scoping review as data charting.

§ The process of systematically examining research evidence to assess its validity, results, and relevance before using it to inform a decision. This term is used for items 12 and 19 instead of "risk of bias" (which is more applicable to systematic reviews of interventions) to include and acknowledge the various sources of evidence that may be used in a scoping review (e.g., quantitative and/or qualitative research, expert opinion, and policy document).

From: Tricco AC, Lillie E, Zarin W, O'Brien KK, Colquhoun H, Levac D, et al. PRISMA Extension for Scoping Reviews (PRISMA-ScR): Checklist and Explanation. *Ann Intern Med.* 2018;169:467–473. doi: 10.7326/M18-0850.

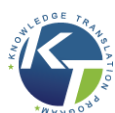

Supplement: Supplementary file 1 [file get_supplementary_file.php]
